# Supplementary material
Source: PubMed Central journal article supplement (PMC1593175)

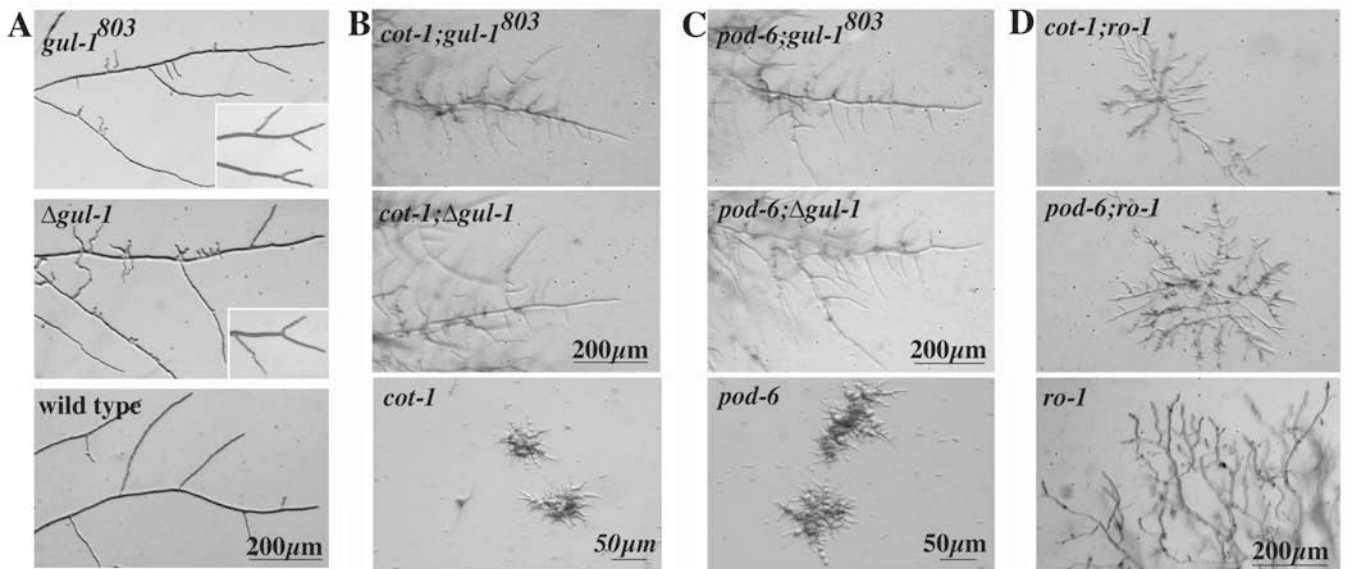

Supplement: mbc_E06-01-0072_1.pdf [file mbc_E06-01-0072_1.pdf]
